# Supplementary material for: Differential immune gene response in gills, skin, and spleen of rainbow trout Oncorhynchus mykiss infected by Ichthyophthirius multifiliis
Source: PubMed Central journal article supplement (PMC6586319; doi:10.1371/journal.pone.0218630), 2019-06-20
Supplement: pone.0218630.s001.pdf [file pone.0218630.s001.pdf]

**S1 Table. Primers and probes used for qPCR assays.**

| Gene                       | Gene ID                | Accession No.        | Forward primer           | Reverse primer             | Probe                       |
|----------------------------|------------------------|----------------------|--------------------------|----------------------------|-----------------------------|
| <i>Cytokines</i>           |                        |                      |                          |                            |                             |
| <i>IL-1 beta</i>           | 100136024              | AJ223954             | ACATTGCCAACCTCATCATCG    | TTGAGCAGGTCCTGTCTTGG       | CATGGAGAGGTTAAAGGGTGGC      |
| <i>IL-4/13a</i>            | 100653462              | AB574337             | ATCCTTCTCTCTCTGTTC       | GAGTGTGTGTGATTGTCTCTG      | CGCACCGGCAGCATAGAAGT        |
| <i>IL-6</i>                | 100136689              | DQ866150             | ACTCCCTCTGTACACACC       | GGCAGACAGGTCCTCACTA        | CCACTGTGCTGATAGGGCTGG       |
| <i>IL-10</i>               | 100136835              | AB118099             | CGACTTTAAATCTCCATCGAC    | GCATTGGACGATCTTTCTTC       | CATCGGAAACATCTCCACGAGCT     |
| <i>IL-17 C1</i>            | 100462681              | CAW30792             | CTGGCGGTACAGCATCGATA     | GAGTTATCCATAATCTCGTATTCGGC | CGTGATGTCCTGCCCTTTGACGATG   |
| <i>IL-17 C2</i>            | 100462682              | CAW30793             | CTGGCGGTACAGCATCGATA     | CAGAGTTATATGCATGATGTTGGC   | CGTGATGTCCTGCCCTTTAATGATG   |
| <i>IL17 A/F2</i>           | 100136642              | AJ580842             | TCAAAGCAACGTGTCGAAG      | TCCCTCTGATCTCTGTGG         | TATGCTGCTGGCCTGACCA         |
| <i>TGF beta</i>            | 100136774              | X99303               | TCTGAATGAGTGGCTGCAAG     | GGTTCCACAATCACAAGG         | CTGGAGAGGAGCAGGGATTCCAAT    |
| <i>TNF alpha*</i>          | 100136034<br>100136064 | AJ277604<br>AJ401377 | GGGGACAAACTGTGGACTGA     | GAAGTCTTGCCTGTCTG          | GACCAATCGACTGACCGACGTGGA    |
| <i>Complement factors</i>  |                        |                      |                          |                            |                             |
| <i>C3</i>                  | 100135918              | AF271080             | ATTGGCCTGTCCAAACACA      | AGCTTCAGATCAAGGAAGAAGTTC   | TGGAATCTGTGTCTGAACCC        |
| <i>C5</i>                  | 100135962              | AF349001             | TGGCAAGGACTTTTTCTGCT     | AGCACAGGTATCCAGGGTTG       | CTGGCAGGGATTGCATCAAATC      |
| <i>Chemokines</i>          |                        |                      |                          |                            |                             |
| <i>IL-8</i>                | 100136039              | AJ279069             | AGAATGTCCAGCCAGCTTGT     | TCTCAGACTCATCCCTCAGT       | TTGTGCTCTGCCCTCTGGA         |
| <i>CK9</i>                 | NI                     | CA378686             | TGTACCTCACCATGGCTCAA     | GCATGATCACAACAGCCTTG       | GAAGCACGTTGTGGCCTGA         |
| <i>CK10</i>                | NI                     | CA361535             | ATTGCCAAGATCCTCTCTGTGTT  | CCTGAGGCTGGTAACCTATGACAAC  | CAGGGCCAGATGGTATGGA         |
| <i>CK11</i>                | NI                     | BX072681             | TTGGGACATCCAGGAACATT     | ACAACAGCGTCGATCTACA        | GATGTCCAACACAACCATGGT       |
| <i>CK12</i>                | NI                     | CA346383             | AACACTCTGCTTGGGCTACG     | GAGGGAAACGGATGTCAAGT       | CGCAGCAGATTCTCAGAGG         |
| <i>Acute phase protein</i> |                        |                      |                          |                            |                             |
| <i>SAA</i>                 | 100136775              | X99385               | GGGAGATGATTCAGGGTTCCA    | TTACGTCCCCAGTGGTTAGC       | TCGAGGACACGAGGACTCAGCA      |
| <i>Hepcidin</i>            | 100135935              | AF281354             | GAGGAGGTTGGAAGCATTGA     | TGACGCTTGAACCTGAAATG       | AGTCCAGTTGGGGAACATCAACAG    |
| <i>Precerebellin</i>       | 100135893              | AF192969             | TGGTGTGCTTTGCTGTTGT      | GCCACTTTGGTTGCTCTC         | ATGGTTGAGACTCAGACGGAGAGTG   |
| <i>S100A1</i>              | 110510474              | BT073924             | GAGCTCAAGGACCTGATGGA     | TCCCCATCTTCTTGTGTG         | GCCTGTCCATCGCCTGTGAA        |
| <i>Cell receptors</i>      |                        |                      |                          |                            |                             |
| <i>CD4</i>                 | 100136285              | AY973028             | CATTAGCCTGGGTGGTCAAT     | CCCTTCTTTGACAGGGAGA        | CAGAAGAGAGAGCTGGATGTCTCCG   |
| <i>CD8 alpha</i>           | 100135889              | AF178054             | ACACCAATGACCACAACCATAGAG | GGGTCCACCTTTCCACTTT        | ACCAGCTCTACAACCTGCAAGTCTGTC |
| <i>Immunoglobulins</i>     |                        |                      |                          |                            |                             |
| <i>IgM</i>                 | NI                     | S63348               | CTTGGCTTGTGACGATGAG      | GGCTAGTGGTGTGAATTGG        | TGGAGAGAACGAGCAGTTCAGCA     |
| <i>IgT</i>                 | NI                     | AY870265             | AGCACCAGGGTGAACCA        | GCGGTGGTTCAGAGTCA          | AGCAAGACGACCTCCAAAACAGAAC   |
| <i>Parasite gene</i>       |                        |                      |                          |                            |                             |
| <i>I-antigen (Ich)</i>     | NI                     | AF324424             | CTGCTGGCACTCTGTGTTAC     | CATTCAAGTACATGATCAGTACC    | ACGATTGCCCTGCTGTGATCA       |
| <i>Reference gene</i>      |                        |                      |                          |                            |                             |
| <i>EF1-alpha</i>           | 100136004              | AF498320             | ACCCTCTCTTGGTCGTTTC      | TGATGACACCAACAGCAACA       | GCTGTGCGTGACATGAGGCA        |

\*primer recognizes two isoforms of TNF alpha; NI: not identified.
